# Supplementary material
Source: PubMed Central journal article supplement (PMC5995503)

Supplementary Figure 1

a

HO

Sox2

NESTIN

Merge

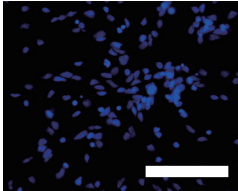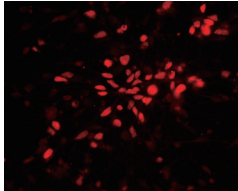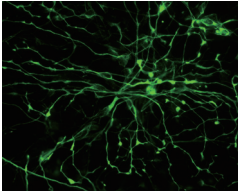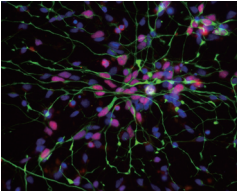

b

HO/DCX

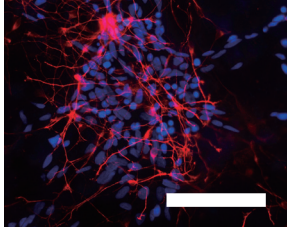

# Supplementary Figure 2

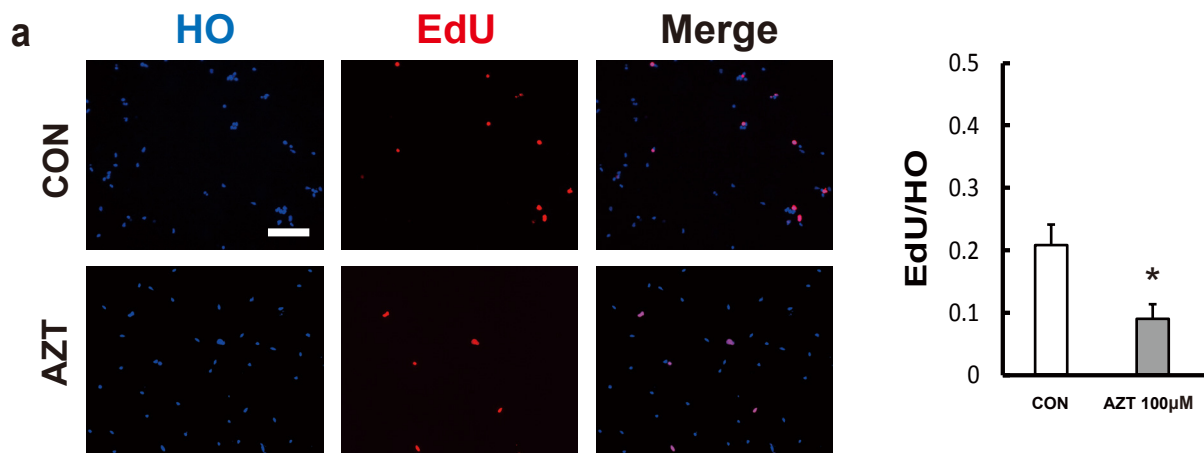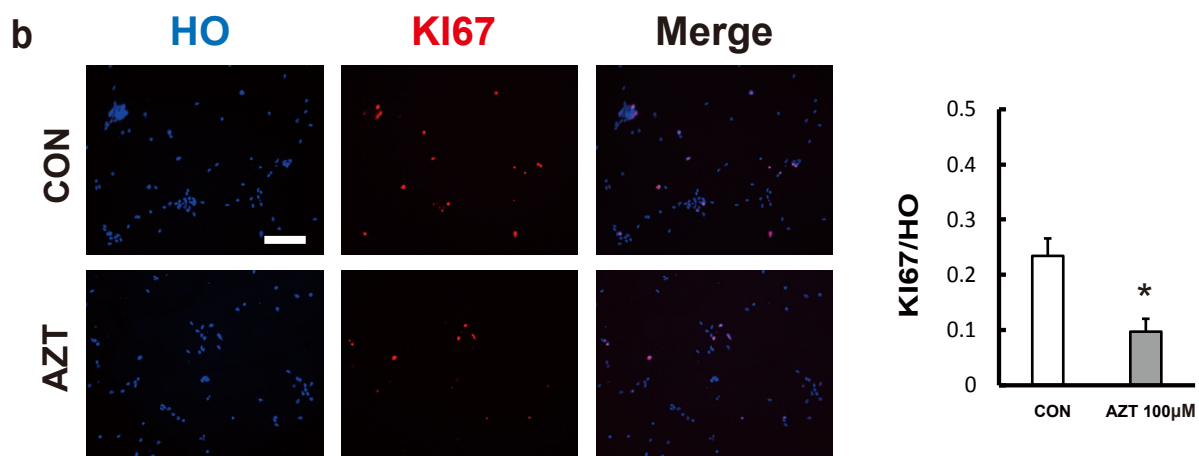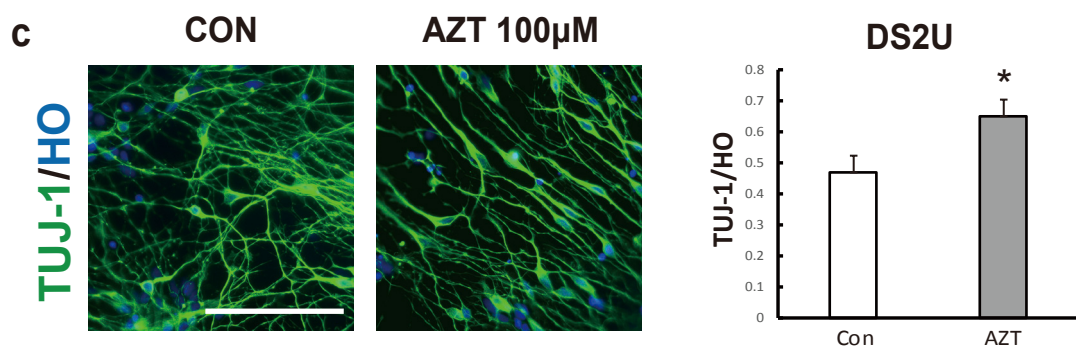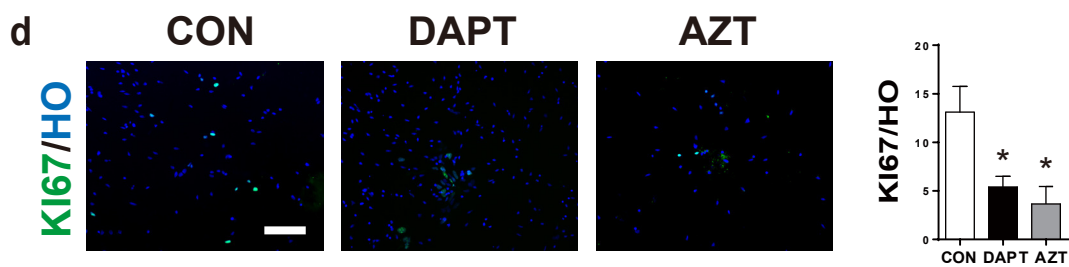

# Supplementary Figure 3

**a**

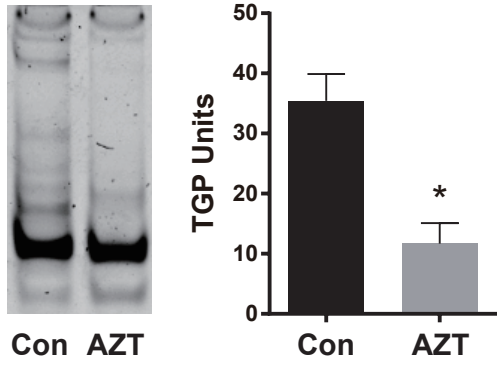

**b**

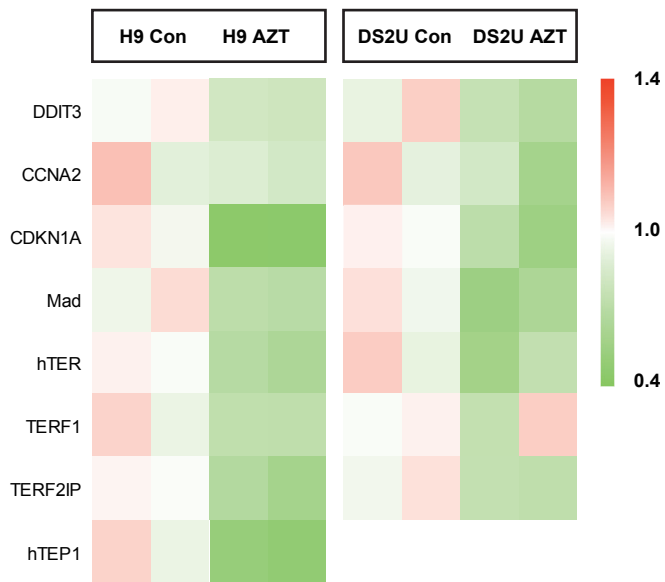

Supplementary Figure 4

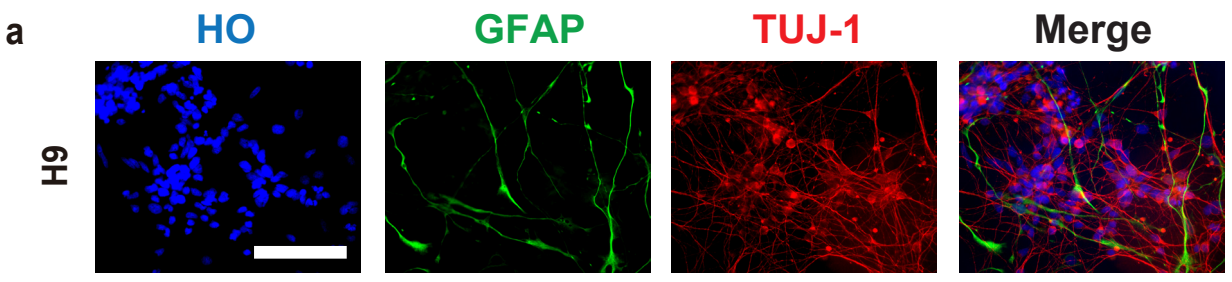

# Supplementary Figure 5

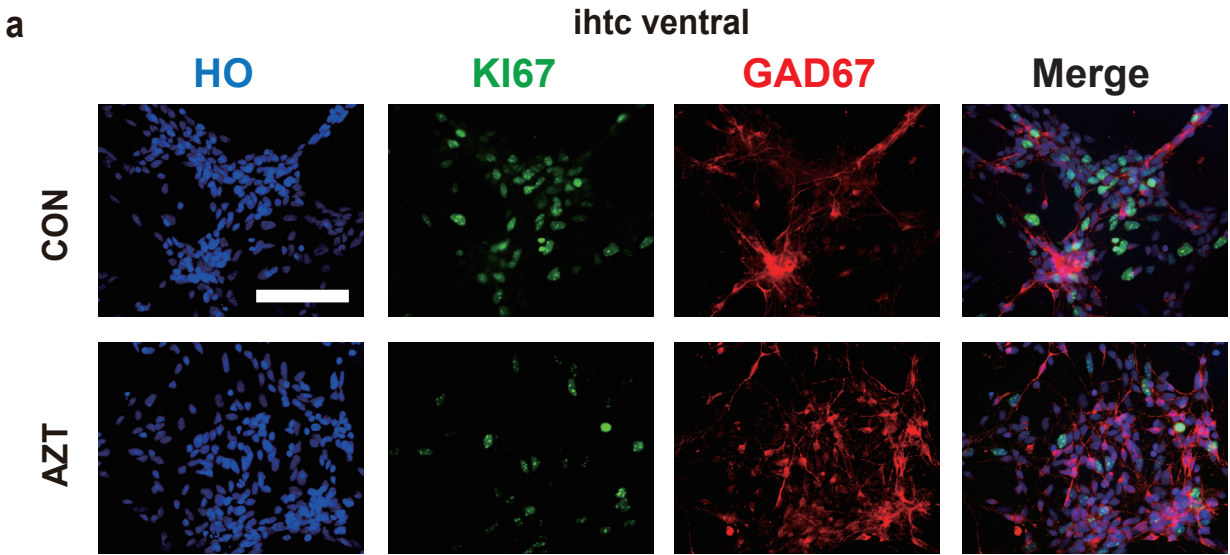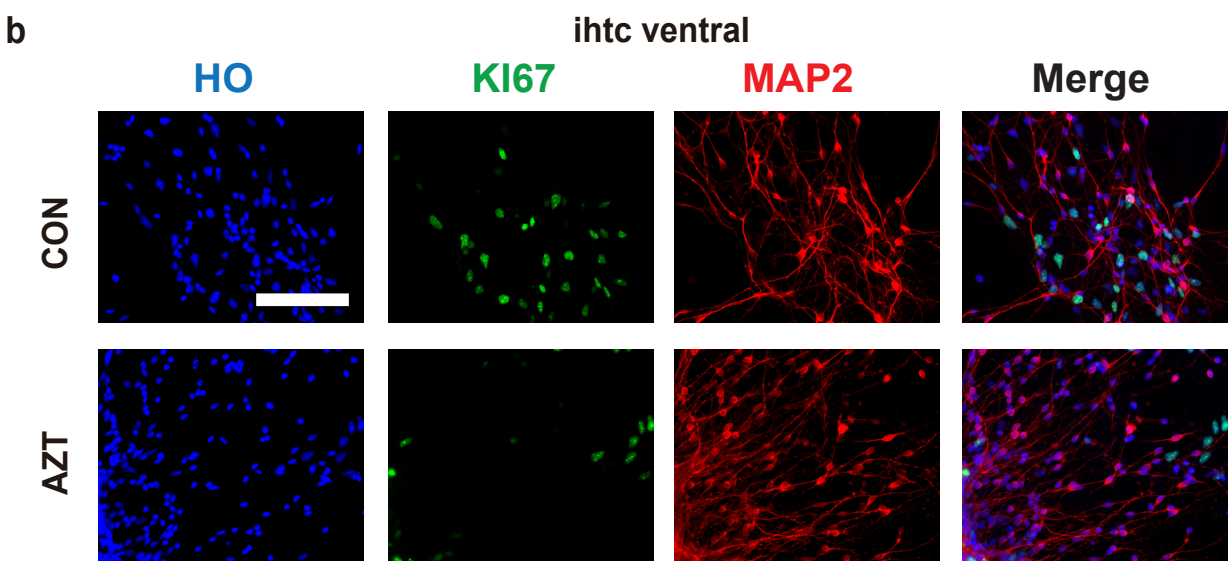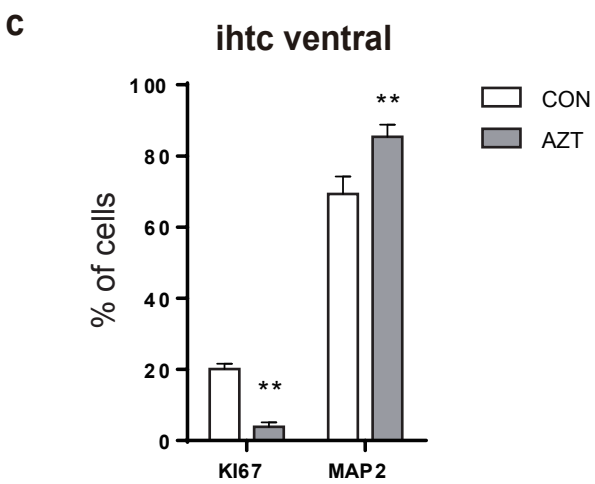

Supplementary Figure 6

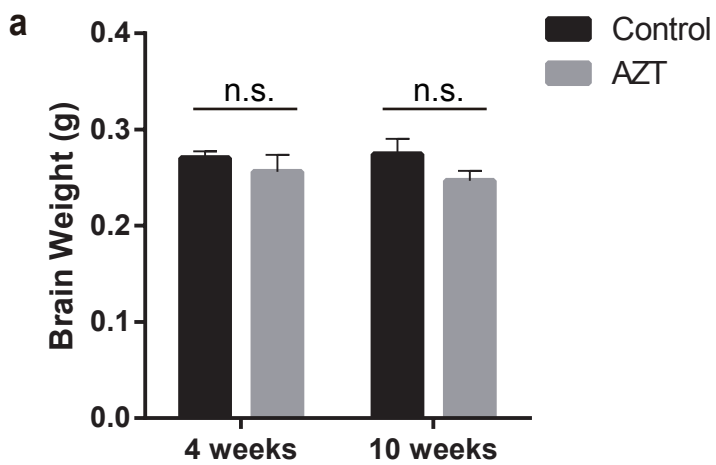

Supplement: 10.1074_M117.809889_jbc.M117.809889-1.pdf [file 10.1074_M117.809889_jbc.M117.809889-1.pdf]
